# Supplementary material for: Platinum(ii/iv) complexes containing ethylenediamine-N,N′-di-2/3-propionate ester ligands induced caspase-dependent apoptosis in cisplatin-resistant colon cancer cells
Source: Royal Society of Chemistry journal article supplement (doi:10.1039/c2mt20058a), 2012-01-01
Supplement: c2mt20058a.pdf [file c2mt20058a.pdf]

# Platinum(II/IV) complexes containing ethylenediamine-*N,N'*-di-2/3-propionate ester ligands induced caspase dependent apoptosis in cisplatin resistant colon cancer cells

Goran N. Kaluđerović,<sup>a,\*</sup> Sanja Mijatović,<sup>b</sup> Bojana B. Zmejkovski,<sup>a,c</sup> Mirna Z. Bulatović,<sup>b</sup> Santiago Gómez-Ruiz,<sup>d</sup> Marija Mojić,<sup>b</sup> Dirk Steinborn,<sup>a</sup> Djordje Miljković,<sup>b</sup> Harry Schmidt,<sup>a</sup> Stanislava D. Stošić-Grujić,<sup>b</sup> Tibor J. Sabo<sup>c</sup> and Danijela Maksimović-Ivanic<sup>b,\*</sup>

Received (in XXX, XXX) Xth XXXXXXXXXX 20XX, Accepted Xth XXXXXXXXXX 20XX

DOI: 10.1039/b000000x

## Materials and methods

<sup>10</sup> K<sub>2</sub>[PtCl<sub>4</sub>] and Na<sub>2</sub>[PtCl<sub>6</sub>] was purchased from Merck and used without further purification. Infrared spectra were recorded on a Perkin-Elmer FTIR 31725-X spectrophotometer using the KBr pellet technique (4000–400 cm<sup>-1</sup>). <sup>1</sup>H and <sup>13</sup>C NMR spectra were recorded on <sup>15</sup> Bruker Avance 500 (500 MHz) spectrometer in DMSO-*d*<sub>6</sub> and CDCl<sub>3</sub>. Elemental analyses for C, H and N were done on a Vario III CHNOS Elemental Analyzer, Elementar Analysensysteme GmbH.

## 20 Synthesis of esters L4-2HCl and L5-2HCl

These esters were prepared by using the esterification reaction previously described.<sup>1,2</sup> Thionyl chloride (4.0 ml, 55 mmol) was introduced into a flask containing 50 ml of respective alcohol (anhydrous conditions) over 1 h. After <sup>25</sup> that 2.0 g (8.31 mmol) of corresponding H<sub>2</sub>edda-type acid hydrochloride, [H<sub>4</sub>edda-type]Cl<sub>2</sub>, were added to the flask and the suspension was refluxed 16 h. The mixture was filtered and the filtrate was left for a few days at 4 °C, yielding the crude product that was filtered off and washed <sup>30</sup> with CHCl<sub>3</sub> (3 x 2 ml).

**L4-2HCl:** [(*S,S*)-H<sub>2</sub>(*i*-Pr)<sub>2</sub>eddp]Cl<sub>2</sub>: yield: 1.76 g, 68%. Anal. calcd. for C<sub>14</sub>H<sub>30</sub>Cl<sub>2</sub>N<sub>2</sub>O<sub>4</sub> (%): C, 46.54; H, 8.37; N, 7.73. Found (%): C, 46.26; H, 8.14; N, 7.82. <sup>1</sup>H NMR [200 MHz, DMSO-*d*<sub>6</sub>]: δ 1.22 (d, 12H, <sup>3</sup>J<sub>H,H</sub> = 6.20 Hz, CH<sub>3</sub>-*i*-<sup>35</sup> Pr), 2.79 and 3.19 ('t' (AA'BB')), 8H, CH<sub>2</sub>-β-ala), 3.33 (s, 4H, CH<sub>2</sub>-(en)), 4.94 (m, 2H, CH-*i*-Pr), 9.72 (s, 4H, NH<sub>2</sub><sup>+</sup>). <sup>13</sup>C NMR [50 MHz, DMSO-*d*<sub>6</sub>]: δ 21.7 (CH<sub>3</sub>-*i*-Pr), 30.6 and 42.3 (CH<sub>2</sub>-β-ala), 42.7 (CH<sub>2</sub>-(en)), 68.3 (CH-*i*-Pr), 169.6 (COO-*i*-Pr). IR [cm<sup>-1</sup>]: ν 3435, 2976, 2727, 2691, 1738, <sup>40</sup> 1404, 1179, 953, 791.

<sup>a</sup>Institut für Chemie, Martin-Luther-Universität Halle-Wittenberg, Kurt-Mothes-Straße 2, 06120 Halle, Germany; E-mail: goran.kaluderovic@chemie.uni-halle.de; Tel.: +49 345 5525678

<sup>b</sup>Institute for Biological Research "Sinisa Stankovic", University of <sup>45</sup> Belgrade, Bulevar despota Stefana 142, 11060 Belgrade, Serbia; E-mail: nelamax@yahoo.com; Tel.: +381 11 207 8390

<sup>c</sup>Department of Chemistry, Institute of Chemistry, Technology and Metallurgy, University of Belgrade, Studentski Trg 12-16, 11000 Belgrade, Serbia;

<sup>50</sup><sup>d</sup>Departamento de Química Inorgánica y Analítica, E.S.C.E.T., Universidad Rey Juan Carlos, 28933 Móstoles, Madrid, Spain;

<sup>e</sup>Faculty of Chemistry, University of Belgrade, Studentski trg 12-16, 11 000 Belgrade, Serbia

**L5-2HCl:** [(*S,S*)-H<sub>2</sub>(*i*-Bu)<sub>2</sub>eddp]Cl<sub>2</sub>: yield 1.58 g, 56%. <sup>55</sup> Anal. calcd. for C<sub>16</sub>H<sub>34</sub>Cl<sub>2</sub>N<sub>2</sub>O<sub>4</sub> (%): C, 49.36; H, 8.80; N, 7.19. Found (%): C, 48.98; H, 8.52; N, 7.16. <sup>1</sup>H NMR [200 MHz, DMSO-*d*<sub>6</sub>]: δ 0.90 (d, 12H, <sup>3</sup>J<sub>H,H</sub> = 6.60 Hz, CH<sub>3</sub>-*i*-Bu), 1.90 (m, 2H, CH-*i*-Bu), 2.85 and 3.21 ('t' (AA'BB')), 8H, CH<sub>2</sub>-β-ala), 3.42 (s, 4H, CH<sub>2</sub>-(en)), 3.87 (d, 4H, <sup>3</sup>J<sub>H,H</sub> = <sup>60</sup> 6.80 Hz, CH<sub>2</sub>-*i*-Bu), 9.76 (s, 4H, NH<sub>2</sub><sup>+</sup>). <sup>13</sup>C NMR [50 MHz, DMSO-*d*<sub>6</sub>]: δ 19.1 (CH<sub>3</sub>-*i*-Bu), 27.3 (CH-*i*-Bu), 30.3 and 42.3 (CH<sub>2</sub>-β-ala), 42.7 (CH<sub>2</sub>-(en)), 70.5 (CH-*i*-Bu), 170.1 (COO-*i*-Bu). IR [cm<sup>-1</sup>]: ν 3445, 2966, 2712, 2438, 2406, 1743, 1377, 1202, 1156, 978, 860.

## Synthesis of platinum(IV) and platinum(II) complexes, 3a–5a

Complexes were obtained by mixing 10 ml aqueous solution of K<sub>2</sub>[PtCl<sub>4</sub>] (0.158 g, 0.512 mmol) or Na<sub>2</sub>[PtCl<sub>6</sub>] <sup>70</sup> (0.232 g, 0.512 mmol) and the respective ligand (**L3-2HCl**: 0.225 g, 0.512 mmol; **L4-2HCl**: 0.185 g, 0.512 mmol; **L5-2HCl**·H<sub>2</sub>O: 0.200 g, 0.512 mmol). During 2 h of stirring 10 cm<sup>3</sup> of 0.1 mol·dm<sup>-3</sup> LiOH were added in small portions to the reaction solution. Within this period a yellow <sup>75</sup> precipitate was observed, filtered off and dried on the air.

**3a:** [PtCl<sub>4</sub>{(*c*-Pe)<sub>2</sub>eddp}]·2H<sub>2</sub>O: yield 98 mg, 18%. Anal. calcd. for C<sub>18</sub>H<sub>32</sub>Cl<sub>4</sub>N<sub>2</sub>O<sub>4</sub>Pt (%): C, 30.31; H, 5.09; N, 3.93. Found (%): C, 30.50; H, 5.15; N, 3.63. <sup>1</sup>H NMR [500 MHz, DMSO-*d*<sub>6</sub>]: δ 1.30–1.95 (m, 16H, CH<sub>2</sub>-*c*-Pe), 1.48 (d, 6H, <sup>80</sup> <sup>3</sup>J<sub>H,H</sub> = 6.80 Hz, CH<sub>3</sub>), 2.87–3.12 (m, 4H, CH<sub>2</sub>-(en)), 4.16 (m, 2H, CH), 5.15 (m, 2H, CH-*c*-Pe), 7.19 (m, 2H, NH). <sup>13</sup>C NMR [125 MHz, DMSO-*d*<sub>6</sub>]: δ 16.6 (CH<sub>3</sub>), 23.4 (CH<sub>2</sub>-*c*-Pe), 32.2 (CH<sub>2</sub>-*c*-Pe), 51.6 (CH<sub>2</sub>-(en)), 59.8 (CH), 78.9 (CH-*c*-Pe), 170.6 (COO-*c*-Pe). IR [cm<sup>-1</sup>]: ν 3114, 2961, <sup>85</sup> 2873, 1723, 1449, 1254, 1204, 1108, 943, 858.

**3b:** [PtCl<sub>2</sub>{(*c*-Pe)<sub>2</sub>eddp}]·H<sub>2</sub>O: yield 235 mg, 81 %. Anal. calcd. for C<sub>18</sub>H<sub>32</sub>Cl<sub>2</sub>N<sub>2</sub>O<sub>4</sub>Pt·H<sub>2</sub>O (%): C, 34.62; H, 5.49; N, 4.49. Found (%): C, 34.81; H, 5.62; N, 4.34. <sup>1</sup>H NMR [500 MHz, DMSO-*d*<sub>6</sub>]: isomer A: δ 1.50–1.85 (m, 16H, CH<sub>2</sub>-*c*-<sup>90</sup> Pe), 1.53 (d, 6H, <sup>3</sup>J<sub>H,H</sub> = 7.05 Hz, CH<sub>3</sub>), 2.46–2.83 (m, 4H, CH<sub>2</sub>-(en)), 4.26 (m, 2H, CH), 5.09 (m, 2H, CH-*c*-Pe) 6.25–6.95 (m, 2H, NH); isomer B: δ 1.50–1.85 (m, 16H, CH<sub>2</sub>-*c*-Pe), 1.38 (d, 6H, <sup>3</sup>J<sub>H,H</sub> = 7.26 Hz, CH<sub>3</sub>), 2.74–2.99 (m, 4H, CH<sub>2</sub>-(en)), 3.89 (m, 2H, CH), 5.09 (m, 2H, CH-*c*-Pe), 7.30–<sup>95</sup> 7.70 (m, 2H, NH). <sup>13</sup>C NMR [125 MHz, DMSO-*d*<sub>6</sub>]: isomer A: δ 14.5 (CH<sub>3</sub>), 23.9 (CH<sub>2</sub>-*c*-Pe), 32.7 (CH<sub>2</sub>-*c*-Pe), 48.8

(CH<sub>2</sub>-(en)), 56.3 (CH), 78.4 (CH-*c*-Pe), 170.1 (COO-*c*-Pe); isomer B: δ 15.4 (CH<sub>3</sub>), 23.9 (CH<sub>2</sub>-*c*-Pe), 32.7 (CH<sub>2</sub>-*c*-Pe), 50.7 (CH<sub>2</sub>-(en)), 57.7 (CH), 77.8 (CH-*c*-Pe), 170.6 (COO-*c*-Pe); isomer ratio A/B = 3/2. IR [cm<sup>-1</sup>]: ν 3095, 2959, 2872, 1730, 1449, 1210, 1119, 957, 839.

**4a:** [PtCl<sub>4</sub>{(*i*-Pr)<sub>2</sub>eddp}].H<sub>2</sub>O: yield 176 mg, 61%. Anal. calcd. for C<sub>14</sub>H<sub>28</sub>Cl<sub>4</sub>N<sub>2</sub>O<sub>4</sub>Pt.H<sub>2</sub>O (%): C, 26.14; H, 4.70; N, 4.35. Found (%): C, 25.72; H, 4.85; N, 4.31. <sup>1</sup>H NMR [200 MHz, DMSO-*d*<sub>6</sub>]: δ 1.20 (d, 12H, <sup>3</sup>J<sub>H,H</sub> = 6.20 Hz, CH<sub>3</sub>-*i*-Pr), 2.83 (m, 8H, CH<sub>2</sub>-β-ala), 3.23-3.79 (m, 4H, CH<sub>2</sub>-(en)), 4.92 (m, 2H, CH-*i*-Pr), 7.67 (m, 2H, NH). <sup>13</sup>C NMR [50 MHz, DMSO-*d*<sub>6</sub>]: δ 21.8 (CH<sub>3</sub>-*i*-Pr), 30.7 (CH<sub>2</sub>-β-ala), 48.2 and 54.4 (CH<sub>2</sub>-(en)), 68.0 (CH-*i*-Pr), 170.6 (COO-*i*-Pr). IR [cm<sup>-1</sup>]: ν 3194, 2981, 1717, 1375, 1205, 1180, 1103, 976, 824.

**5a:** [PtCl<sub>4</sub>{(*i*-Bu)<sub>2</sub>eddp}].H<sub>2</sub>O: yield 182 mg, 61%. Anal. calcd. for C<sub>14</sub>H<sub>28</sub>Cl<sub>4</sub>N<sub>2</sub>O<sub>4</sub>Pt.H<sub>2</sub>O (%): C, 29.41; H, 4.94; N, 4.29. Found (%): C, 29.67; H, 4.79; N, 4.46. <sup>1</sup>H NMR [200 MHz, DMSO-*d*<sub>6</sub>]: δ 0.90 (d, 12H, <sup>3</sup>J<sub>H,H</sub> = 6.60 Hz, CH<sub>3</sub>-*i*-Bu), 1.89 (m, 2H, CH-*i*-Bu), 2.89 (m, 8H, CH<sub>2</sub>-β-ala), 3.25-3.50 (m, 4H, CH<sub>2</sub>-(en)), 3.85 (d, 4H, <sup>3</sup>J<sub>H,H</sub> = 6.20 Hz, CH<sub>2</sub>-*i*-Bu), 7.70 (m, 2H, NH). <sup>13</sup>C NMR [50 MHz, DMSO-*d*<sub>6</sub>]: δ 19.0 (CH<sub>3</sub>-*i*-Bu), 27.3 (CH-*i*-Bu), 30.4 (CH<sub>2</sub>-β-ala), 48.1 and 54.4 (CH<sub>2</sub>-(en)), 70.3 (CH-*i*-Bu), 171.1 (COO-*i*-Bu). IR [cm<sup>-1</sup>]: ν 3172, 2961, 2874, 1725, 1452, 1382, 1205, 1181, 988, 853.

#### X-ray structure determination for **3a**

The crystals were obtained mixing diluted aqueous solutions of Na<sub>2</sub>[PtCl<sub>6</sub>] and **L3**·2HCl. After few days on room temperature yellow crystals were obtained. The data of complex **3a** were collected with a CCD Oxford Xcalibur S diffractometer (λ(MoKα) = 0.71073 Å) using multiscan mode (Table S1). Semi-empirical from equivalents absorption corrections were carried out with SCALE3 ABSPACK software.<sup>3</sup> The structure was solved with direct method.<sup>4</sup> Structure refinement was carried out with SHELXL-97.<sup>5</sup> All non-hydrogen atoms were refined anisotropically, and H atoms were placed at calculated

positions and refined isotropically using the riding model. ORTEP-3 program has been used for representation of the structures.<sup>6</sup> The Flack parameter was used to determine the absolute configuration of a structural model determined by single-crystal structure.<sup>7</sup> Details regarding crystallographic data and selected bond lengths and angles are included in Table S2.. Crystallographic data for the structural analysis of **3a** have been deposited with the Cambridge Crystallographic Data Centre, CCDC-855121. Copies of this information may be obtained free of charge from The Director, CCDC, 12 Union Road, Cambridge CB2 1EZ, UK (Fax: +44-1223-336033; E-mail: deposit@ccdc.cam.ac.uk or http://www.ccdc.cam.ac.uk).

#### References

1. B. B. Krajčević, G. N. Kaluđerović, D. Steinborn, H. Schmidt, Ch. Wagner, Ž. Žižak, Z. D. Juranić, S. R. Trifunović and Sabo, *J. Inorg. Biochem.* 2008, **102**, 892–900.
2. B. B. Zmejkovski, G. N. Kaluđerović, S. Gómez-Ruiz, Ž. Žižak, D. Steinborn, H. Schmidt, R. Paschke, Z. D. Juranić and T. J. Sabo, *Eur. J. Med. Chem.* 2009, **44**, 3452–3458.
3. SCALE3 ABSPACK: Empirical absorption correction, CrysAlis – Software package, Oxford Diffraction Ltd. 2006.
4. G. M. Sheldrick, SHELXS-97, Program for Crystal Structure Solution, Göttingen, 1997.
5. G. M. Sheldrick, SHELXL-97, Program for the Refinement of Crystal Structures, Göttingen, 1997.
6. L. J. Farrugia, ORTEP3 for Windows. *J. Appl. Cryst.* 1997, **30**, 565.
7. H.D. Flack, *Acta Cryst. A* 1983, **39**, 876–881.

**Table S1.** Crystallographic data for the structural analyse of **3a**.

|                                                     |                                                                                  |
|-----------------------------------------------------|----------------------------------------------------------------------------------|
| Empirical formula                                   | C <sub>18</sub> H <sub>32</sub> Cl <sub>4</sub> N <sub>2</sub> O <sub>4</sub> Pt |
| Formula weight                                      | 677.35                                                                           |
| Temperature                                         | 130(2) K                                                                         |
| Wavelength                                          | 71.073 pm                                                                        |
| Crystal system                                      | Orthorhombic                                                                     |
| Space group                                         | <i>P</i> 2 <sub>1</sub> 2 <sub>1</sub> 2 <sub>1</sub>                            |
| Unit cell dimensions                                | <i>a</i> = 1089.35(2) pm<br><i>b</i> = 1449.89(2) pm<br><i>c</i> = 1518.23(3) pm |
| Volume                                              | 2.39795(7) nm <sup>3</sup>                                                       |
| <i>Z</i>                                            | 4                                                                                |
| Density (calculated)                                | 1.876 Mg/m <sup>3</sup>                                                          |
| Absorption coefficient                              | 6.323 mm <sup>-1</sup>                                                           |
| <i>F</i> (000)                                      | 1328                                                                             |
| Crystal size                                        | 0.12 × 0.08 × 0.08 mm <sup>3</sup>                                               |
| Theta range for data collection                     | 2.68 to 30.51°.                                                                  |
| Index ranges                                        | −15 ≤ <i>h</i> ≤ 15,<br>−20 ≤ <i>k</i> ≤ 20,<br>−21 ≤ <i>l</i> ≤ 21              |
| Reflections collected                               | 84425                                                                            |
| Independent reflections                             | 7306 [ <i>R</i> (int) = 0.0779]                                                  |
| Completeness to <i>θ</i> = 30.51°                   | 99.9 %                                                                           |
| Max. and min. transmission                          | 1 and 0.79542                                                                    |
| Data / restraints / parameters                      | 7306 / 12 / 212                                                                  |
| Goodness-of-fit on <i>F</i> <sup>2</sup>            | 0.965                                                                            |
| Final <i>R</i> indices [ <i>I</i> > 2σ( <i>I</i> )] | <i>R</i> <sub>1</sub> = 0.0397,<br><i>wR</i> <sub>2</sub> = 0.0801               |
| <i>R</i> indices (all data)                         | <i>R</i> <sub>1</sub> = 0.0521,<br><i>wR</i> <sub>2</sub> = 0.0824               |
| Absolute structure parameter                        | −0.002(7)                                                                        |
| Largest diff. peak and hole                         | 3.762 and −1.587 e.Å <sup>-3</sup>                                               |

**Table S2.** Selected bond lengths (pm) and angles (°) for **3a**.

|         |          |             |           |
|---------|----------|-------------|-----------|
| Pt1 –N1 | 209.7(5) | N1–Pt1–N2   | 84.6(2)   |
| Pt1–N2  | 209.8(5) | N1–Pt1–Cl3  | 177.6(2)  |
| Pt1–Cl3 | 230.6(2) | N2–Pt1–Cl3  | 93.0(1)   |
| Pt1–Cl1 | 230.6(2) | N1–Pt1–Cl1  | 92.9(2)   |
| Pt1–Cl2 | 230.8(1) | N2–Pt1–Cl1  | 177.5(1)  |
| Pt1–Cl4 | 231.3(1) | Cl3–Pt1–Cl1 | 89.52(6)  |
| O1–C5   | 120.0(7) | N1–Pt1–Cl2  | 88.1(1)   |
| O2–C5   | 132.0(8) | N2–Pt1–Cl2  | 90.1(1)   |
| O2–C6   | 148.2(8) | Cl3–Pt1–Cl2 | 92.01(6)  |
| O3–C13  | 119.0(7) | Cl1–Pt1–Cl2 | 90.14(6)  |
| O4–C13  | 132.4(8) | N1–Pt1–Cl4  | 88.6(1)   |
| O4–C14  | 147.8(9) | N2–Pt1–Cl4  | 87.6(1)   |
|         |          | Cl3–Pt1–Cl4 | 91.21(6)  |
|         |          | Cl1–Pt1–Cl4 | 92.07(6)  |
|         |          | Cl2–Pt1–Cl4 | 176.11(7) |

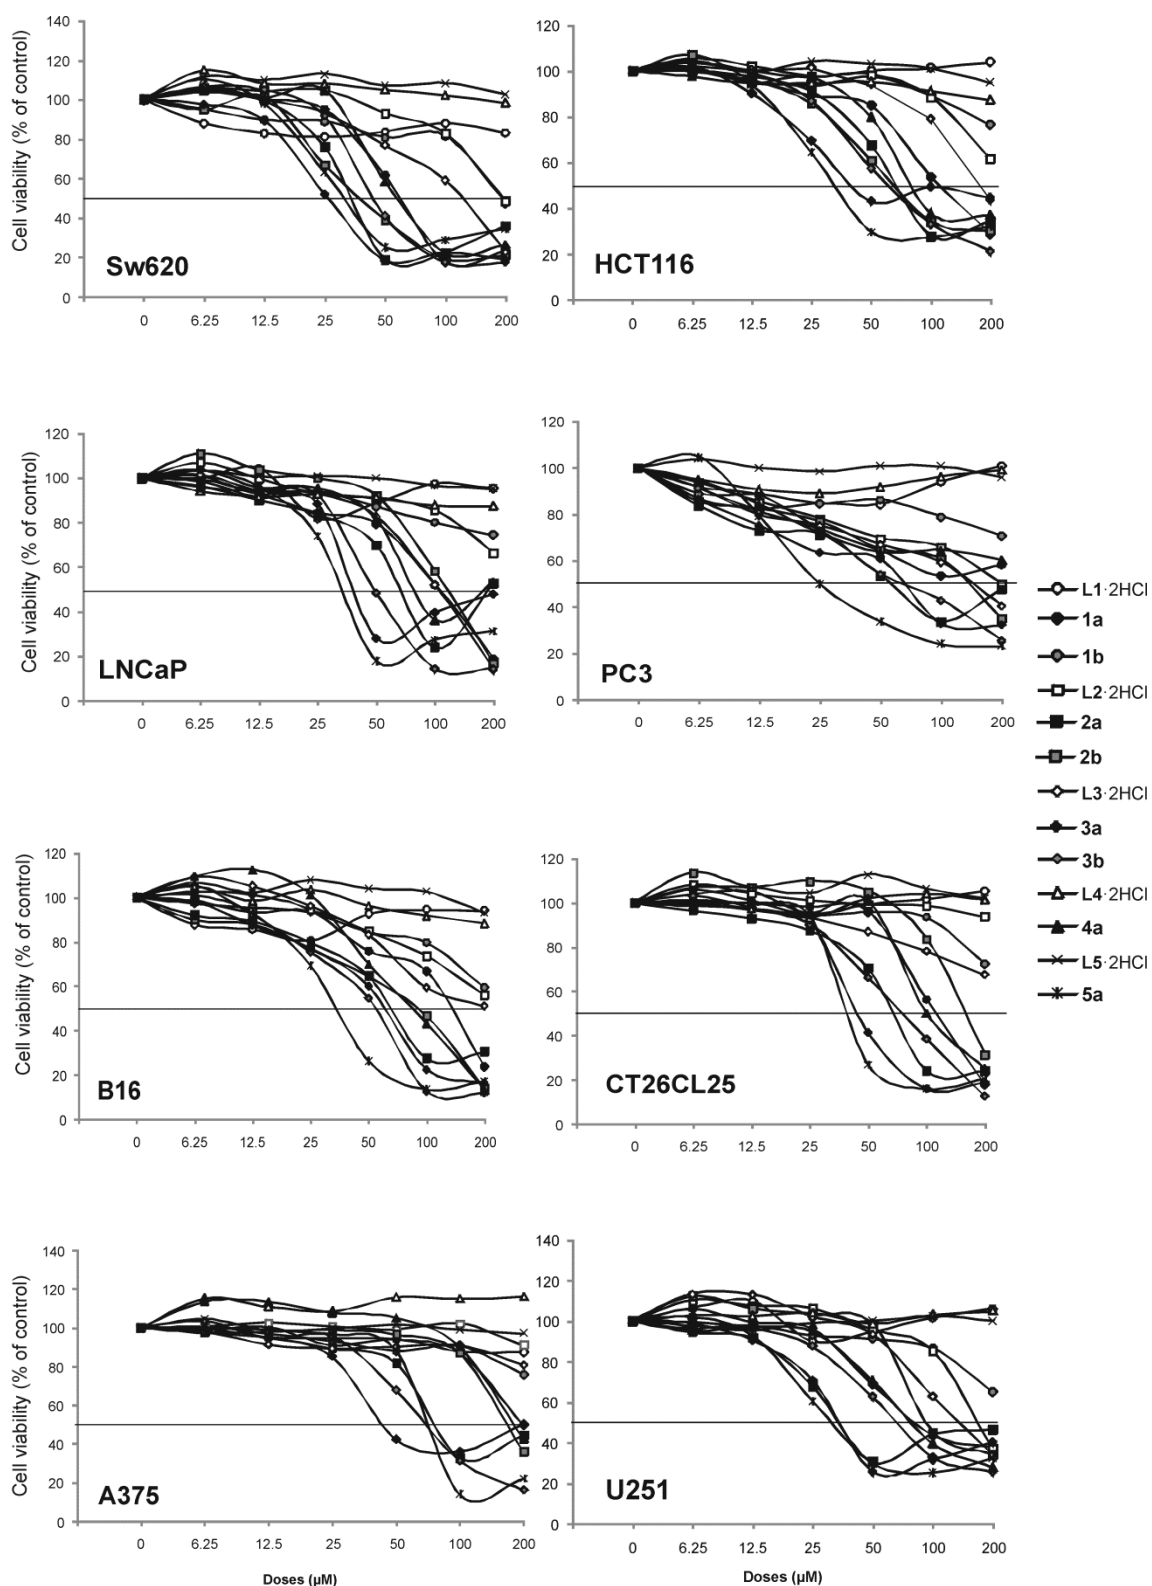

**Fig. S1.** The effect of ligand precursors and their platinum(II/IV) on viability of malignant cells. Cells ( $1 \times 10^4$ /well) were treated with a range of concentrations of tested compounds for 24 h, after which cell viability was determined by CV assay. The data are presented as mean from representative of three independent experiments while SD was less than 10 %.
